# Supplementary material
Source: publisher figshare collection journal article supplement (https://karger.figshare.com/ndownloader/files/30593592)
Supplement: Supplementary file 1 [file 30593592]

**Supplementary Table 1.** Variants in the human *AMH* gene published after the exhaustive review by Picard et al., 2017.

| **Patient** | **Origin** | **Exon-intron** | **Mutation** | **Effect** | **Alleles** | **Reference** | **Condition** |
| --- | --- | --- | --- | --- | --- | --- | --- |
| 1 | ? | 1 | NM_000479.3:c.203_203delC | NM_000479.3:p.(p. L70Cfs*7) | Homo | Mazen, 2017 | PMDS |
| 2 | ? | 1 | NM_000479.3:c.283C>T | NM_000479.3:p.(Arg95*) | Hetero (compound) | Hughes, 2019 | PMDS |
| 2 | ? | 5 | NM_000479.3:c.905G>A | NM_000479.3:p.(Arg302Gln) | Hetero (compound) | Hughes, 2019 | PMDS |
| 3 | Turkey | 1 | NM_000479.3:c.301G>A | NM_000479.3:p.(Gly101Arg) | Homo | Bugrul, 2020 | PMDS |
| 4 | Turkey | 3 | NM_000479.3:c.563G>A | NM_000479.3:p.(Cys188Tyr) | Homo | Ata, 2021 | PMDS |
| 5 | ? | 3 | NM_000479.3:c.649C>T | NM_000479.3:p.(Gly217*) | Homo | Hughes, 2019 | PMDS |
| 6 | Turkey | 5 | NM_000479.3:c.1577G>T | NM_000479.3:p.(Cys526Phe) | Homo | Bugrul, 2020 | PMDS |
| 7 | Turkey | 5 | NM_000479.3:c.1673G>A | NM_000479.3:p.(Gly558Asp) | Homo | Bugrul, 2020 | PMDS |
|  |  |  |  |  |  |  |  |
| 9 | Europe | 1 | NM_000479.3:c.295A>T | NM_000479.3:p.(Thr99Ser) | Hetero (1 allele) | Malone, 2019 | HH |
| 10 | Europe | 2 | NM_000479.3:c.451C>T | NM_000479.3:p.(Pro151Ser) | Hetero (1 allele) | Malone, 2019 | HH |
| 11 | Europe | 4 | NM_000479.3:c.714C>A | NM_000479.3:p.(Asp238Glu) | Hetero (1 allele) | Malone, 2019 | HH |

***References***

Ata A, Ozen S, Onay H, Uzun S, Goksen D, Ozkinay F, Ozbaran NB, Ulman I, Darcan S: A large cohort of disorders of sex development and their genetic characteristics: 6 novel mutations in known genes. Eur J Med Genet 64:104154 (2021).

Bugrul F, Abali ZY, Kirkgoz T, Cerit KK, Canmemis A, Turan S, Tugtepe H, Picard JY, Bereket A, Guran T: Persistent Mullerian Duct Syndrome: A Rare But Important Etiology of Inguinal Hernia and Cryptorchidism. Sex Dev (2020).

Hughes LA, McKay-Bounford K, Webb EA, Dasani P, Clokie S, Chandran H, McCarthy L, Mohamed Z, Kirk JMW, Krone NP, Allen S, Cole TRP: Next generation sequencing (NGS) to improve the diagnosis and management of patients with disorders of sex development (DSD). Endocr Connect 8:100-110 (2019).

Malone SA, Papadakis GE, Messina A, Mimouni NEH, Trova S, Imbernon M, Allet C, Cimino I, Acierno J, Cassatella D, Xu C, Quinton R, Szinnai G, Pigny P, Alonso-Cotchico L, Masgrau L, Marechal JD, Prevot V, Pitteloud N, Giacobini P: Defective AMH signaling disrupts GnRH neuron development and function and contributes to hypogonadotropic hypogonadism. Elife 8 (2019).

Mazen I, El-Gammal M, McElreavey K, Elaidy A, Abdel-Hamid MS: Novel AMH and AMHR2 Mutations in Two Egyptian Families with Persistent Mullerian Duct Syndrome. Sex Dev 11:29-33 (2017).

**Supplementary Table 2.** Variants in the human *AMHR2* gene published after the exhaustive review by Picard et al., 2017.

| **Patient** | **Origin** | **Exon-intron** | **Variant** | **Effect** | **Alleles** | **Publication** | **Condition** |
| --- | --- | --- | --- | --- | --- | --- | --- |
| 1 | Turkey | 1 | NM_020547.2:c.24G>A | NM_020547.2:p.(Trp8*) | Homo | Ata, 2021 | PMDS |
| 2 | India | 2 | NM_020547.2:c.119G>C | NM_020547.2:p.Gly40Ala | Homo | Fernandez Cancio, 2019 | PMDS |
| 3 | Turkey | 2nd Intr | NM_020547.2:c.233–1G>A |  | Homo | Unal, 2018 | PMDS |
| 4 | ? | 3 | NM_020547.2:c.237C>G | NM_020547.2:p.Cys79Trp | Homo | Eggers, 2016 | PMDS |
| 5 | ? | 3 | NM_020547.2:c.289C>T | NM_020547.2:p.(Arg97*) | Homo | Hughes, 2019 | PMDS |
| 6 | Spain | 4 | NM_020547.2:c.502G>A | NM_020547.2:p.Ala168Thr | Hetero (compound) | Orós-Millán, 2017 | PMDS |
| 6 | Spain | 7 | NM_020547.2:c.877C>T | NM_020547.2:p.Gln293* | Hetero (compound) | Orós-Millán, 2017 | PMDS |
| 7 | ? | 6 | NM_020547.2:c.745C>T | NM_020547.2:p.Leu249Phe | Hetero (compound) | Baxter, 2015 | PMDS |
| 7 | ? | 10 | NM_020547.2:c.1332_1358del | NM_020547.2:p.Gly445_Leu453del | Hetero (compound) | Baxter, 2015 | PMDS |
| 8 | ? | 6 | NM_020547.2:c.813_817delGCTCT | NM_020547.2:p.Leu272Trpfs*24 | Hetero (compound) | Hughes, 2019 | PMDS |
| 8 | ? | 7 | NM_020547.2:c.931G>A | NM_020547.2:p.(Gly311Ser) | Hetero (compound) | [Hughes, 2019](https://www.ncbi.nlm.nih.gov/pubmed/?term=Elias-Assad) | PMDS |
| 9 | Colombia | 7 | NM_020547.2:c.916delC | NM_020547.2:p.Leu306Cysfs*29 | Homo | García Acero, 2019 | PMDS |
| 10 | China | 9 | NM_020547.2:c.1186_1187delC | NM_020547.2:p.Leu396Glyfs*13 | Hetero (compound) | Ren, 2017 | PMDS |
| 10 | China | 10 | NM_020547.2:c.1388G>A | NM_020547.2:p.Arg463His | Hetero (compound) | Ren, 2017 | PMDS |
| 11 | ? | 10 | NM_020547.2:c.1332_1358del | NM_020547.2:p.Gly445_Leu453del | Hetero (compound) | Baxter, 2015 | PMDS |
| 11 | ? | 10 | NM_020547.2:c.1343C>G | NM_020547.2:p.Pro448Arg | Hetero (compound) | Baxter, 2015 | PMDS |
| 12 | Turkey | 10 | NM_020547.2:c.1372G>T | NM_020547.2:p.Val458Leu | Homo | Çakir, 2017 | PMDS |
| 13 | Turkey | 11 | NM_020547.2:c.1510C>T | NM_020547.2:p.Arg504Cys | Homo | Bugrul, 2020 | PMDS |
| 14 | Romania |  | del 12q13.13 chr12:53,829,597-53,833,931 | 11,39 kb, removing exons 7–11 and extending far beyond the AMHR2 gene | Homo | Tosca, 2020 | PMDS |
| 15 | Netherlands |  | del 12q13.13 | 10,53 kb, encompassing the whole AMHR2 gene | Hetero (compound) | Tosca, 2020 | PMDS |
|  |  |  |  |  |  |  |  |
| 21 | China | 6 | NM_020547.2:c.626T>A | NM_020547.2:p.Ile209Asn | Hetero (1 allele) | Qin, 2014 | POI |
| 22 | China | 8 | NM_020547.2:c.1060C>T | NM_020547.2:p.Lys354Phe | Hetero (1 allele) | Qin, 2014 | POI |
|  |  |  |  |  |  |  |  |
| 23 | European | 10 | NM_020547.2:c.1330_1356del | NM_020547.2:p.Gly445_Leu453del | Hetero (1 allele) | Malone, 2019 | HH |

***References***

Ata A, Ozen S, Onay H, Uzun S, Goksen D, Ozkinay F, Ozbaran NB, Ulman I, Darcan S: A large cohort of disorders of sex development and their genetic characteristics: 6 novel mutations in known genes. Eur J Med Genet 64:104154 (2021).

Baxter RM, Arboleda VA, Lee H, Barseghyan H, Adam MP, Fechner PY, Bargman R, Keegan C, Travers S, Schelley S, Hudgins L, Mathew RP, Stalker HJ, Zori R, Gordon OK, Ramos-Platt L, Pawlikowska-Haddal A, Eskin A, Nelson SF, Delot E, Vilain E: Exome sequencing for the diagnosis of 46,XY disorders of sex development. J Clin Endocrinol Metab 100:E333-344 (2015).

Bugrul F, Abali ZY, Kirkgoz T, Cerit KK, Canmemis A, Turan S, Tugtepe H, Picard JY, Bereket A, Guran T: Persistent Mullerian Duct Syndrome: A Rare But Important Etiology of Inguinal Hernia and Cryptorchidism. Sex Dev (2020).

Çakir AD, Turan H, Onay H, Emir H, Emre S, Comunoglu N, Ercan O, Evliyaoglu O: A Novel Mutation of AMHR2 In Two Siblings with Persistent Mullerian Duct Syndrome. Sex Dev 11:289-292 (2017).

Eggers S, Sadedin S, van den Bergen JA, Robevska G, Ohnesorg T, Hewitt J, Lambeth L, Bouty A, Knarston IM, Tan TY, Cameron F, Werther G, Hutson J, O'Connell M, Grover SR, Heloury Y, Zacharin M, Bergman P, Kimber C, Brown J, Webb N, Hunter MF, Srinivasan S, Titmuss A, Verge CF, Mowat D, Smith G, Smith J, Ewans L, Shalhoub C, Crock P, Cowell C, Leong GM, Ono M, Lafferty AR, Huynh T, Visser U, Choong CS, McKenzie F, Pachter N, Thompson EM, Couper J, Baxendale A, Gecz J, Wheeler BJ, Jefferies C, MacKenzie K, Hofman P, Carter P, King RI, Krausz C, van Ravenswaaij-Arts CM, Looijenga L, Drop S, Riedl S, Cools M, Dawson A, Juniarto AZ, Khadilkar V, Khadilkar A, Bhatia V, Dung VC, Atta I, Raza J, Thi Diem Chi N, Hao TK, Harley V, Koopman P, Warne G, Faradz S, Oshlack A, Ayers KL, Sinclair AH: Disorders of sex development: insights from targeted gene sequencing of a large international patient cohort. Genome Biol 17:243 (2016).

Fernández-Cancio M, Viswanath N, Puzhankara R, Valiyaprambil Pavithran P, Mora-Palma C, Camats N, Audi L, Benito-Sanz S: A Novel Homozygous AMRH2 Gene Mutation in a Patient with Persistent Mullerian Duct Syndrome. Sex Dev 13:87-91 (2019).

García Acero M, Moreno O, Gutiérrez A, Sánchez C, Catano JG, Suárez-Obando F, Rojas A: Novel homozygous mutation in a colombian patient with persistent mullerian duct syndrome: expanded phenotype. Int Braz J Urol 45:1064-1070 (2019).

Hughes LA, McKay-Bounford K, Webb EA, Dasani P, Clokie S, Chandran H, McCarthy L, Mohamed Z, Kirk JMW, Krone NP, Allen S, Cole TRP: Next generation sequencing (NGS) to improve the diagnosis and management of patients with disorders of sex development (DSD). Endocr Connect 8:100-110 (2019).

Malone SA, Papadakis GE, Messina A, Mimouni NEH, Trova S, Imbernon M, Allet C, Cimino I, Acierno J, Cassatella D, Xu C, Quinton R, Szinnai G, Pigny P, Alonso-Cotchico L, Masgrau L, Marechal JD, Prevot V, Pitteloud N, Giacobini P: Defective AMH signaling disrupts GnRH neuron development and function and contributes to hypogonadotropic hypogonadism. Elife 8 (2019).

Orós-Millán ME, Muñoz-Calvo MT, Nishi MY, Mendonça B, Argente J: [Persistent Mullerian duct syndrome due to a mutation in the anti-Mullerian hormone receptor gene (AMHR2)]. An Pediatr (Barc) 86:94-95 (2017).

Qin C, Yuan Z, Yao J, Zhu W, Wu W, Xie J: AMH and AMHR2 genetic variants in Chinese women with primary ovarian insufficiency and normal age at natural menopause. Reprod Biomed Online 29:311-318 (2014).

Ren X, Wu D, Gong C: Persistent Mullerian duct syndrome: A case report and review. Exp Ther Med 14:5779-5784 (2017).

Tosca L, Giltay JC, Bouvattier C, Klijn AJ, Bouligand J, Lambert AS, Lecerf L, Josso N, Tachdjian G, Picard JY: Persistent Mullerian duct syndrome due to anti-Mullerian hormone receptor 2 microdeletions: a diagnostic challenge. Hum Reprod 35:999-1003 (2020).

Unal E, Yildirim R, Tekin S, Demir V, Onay H, Haspolat YK: A Novel Mutation of AMHR2 in Two Siblings with Persistent Müllerian Duct Syndrome. J Clin Res Pediatr Endocrinol 10:387-390 (2018).
